# Supplementary material for: Autologous non‐human primate model for safety assessment of piggyBac transposon‐mediated chimeric antigen receptor T cells on granulocyte–macrophage colony‐stimulating factor receptor
Source: PubMed Central journal article supplement (PMC7680920; doi:10.1002/cti2.1207), 2020-11-22
Supplement: CTI2-9-e1207-s001.pdf [file CTI2-9-e1207-s001.pdf]

1 **Supporting Information**

2

3 **Supplementary figure 1**

4 Amino-acid sequences of the GMR in cynomolgus macaque and human.

5

6 **Supplementary figure 2**

7 a. Cynomolgus hGMRs expressed on M1 macrophages. Blue lines exhibit isotype and red  
8 lines exhibit CD116 expression on M1 macrophages. b. Cynomolgus hGMR-CAR-T or control  
9 T (Ctrl) cells were cocultured with cynomolgus M1 macrophages (M1) at an E:T ratio of 1:1.

10

11 **Supplementary figure 3**

12 In-house data of blood examination. Two to four-years-old healthy cynomolgus macaques  
13 housed in Ina Research Inc. from 2016 to 2019 were subjected to a blood examination to  
14 obtain the reference values. The minimum and maximum values of each parameter were  
15 determined.

16 n; number of macaques analyzed, HGB; hemoglobin, WBC; white blood cell, Mono;  
17 monocyte, Neut; neutrophil, Mono; monocyte, AST; aspartate transaminase, ALT; alanine  
18 transaminase, LDH; lactate dehydrogenase, CPK; creatine phosphokinase, CRP; C-reactive  
19 protein

20

21 **Supplementary figure 4**

22 Complete blood counts and blood chemistry of all macaques before and at the indicated  
23 days after adoptive transfer cynomolgus GMR-CAR-T cells.

24 WBC; white blood cell, Neut; neutrophil, Lym lymphocyte, Mono; monocyte, Hb;

25 hemoglobin, Retic; reticulocyte, CRP; C-reactive protein, CPK; creatine phosphokinase, LDH;

26 lactate dehydrogenase, AST; aspartate transaminase, ALT; alanine transaminase

27

28 **Supplementary figure 5**

29 Coagulation tests of all macaques before and at the indicated days after adoptive transfer

30 cynomolgus GMR-CAR-T cells.

31 PT; prothrombin time, APTT; activated partial thromboplastin time

32

33 **Supplementary table 1.**

34 There were no microscopic changes in the liver, gall bladder, kidney, spleen, heart, brain,

35 and thoracic spinal cord due to CAR-T cell infusion, although infiltration of cynomolgus

36 mononuclear cells was detected in the liver and kidney, and this is a normal change.

37

## Supplementary figure 1

|        |                                                                                                   |     |
|--------|---------------------------------------------------------------------------------------------------|-----|
| MACACA | MWLQ <b>G</b> LLLLGTVACSI SAPARSPSP <b>G</b> TQPWEHVNAIQEARRLLNLSRD TAAEMN <b>K</b> TVEV <b>V</b> | 60  |
| _HUMAN | MWLQ <b>S</b> LLLLGTVACSI SAPARSPSP <b>S</b> TQPWEHVNAIQEARRLLNLSRD TAAEMN <b>E</b> TVEV <b>I</b> |     |
| MACACA | SEMF DLQEP <b>S</b> CLQTRLELYKQGL <b>Q</b> GS LTKLKGPLTMMASHYKQHCPPTPETS CATQIITF                 | 120 |
| _HUMAN | SEMF DLQEP <b>T</b> CLQTRLELYKQGL <b>R</b> GS LTKLKGPLTMMASHYKQHCPPTPETS CATQIITF                 |     |
| MACACA | <b>Q</b> SFKENLKDFLLVIPFDCWEPVQE                                                                  |     |
| _HUMAN | <b>E</b> SFKENLKDFLLVIPFDCWEPVQE                                                                  |     |

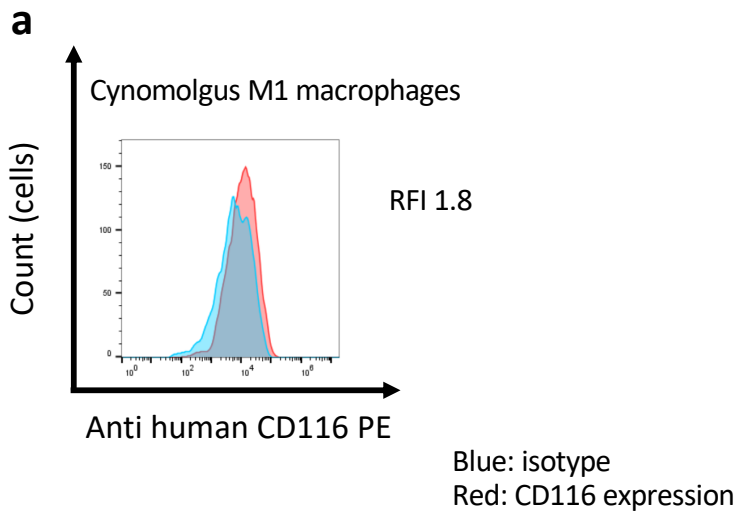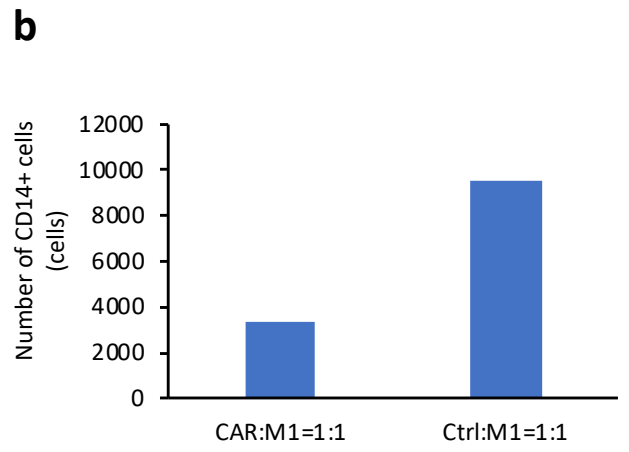

| Parameters (Unit)           | n   | Min  | Max   |
|-----------------------------|-----|------|-------|
| HGB (g/dL)                  | 525 | 10.8 | 15.9  |
| WBC ( $10^3/\mu\text{L}$ )  | 524 | 3.48 | 22.08 |
| Neut ( $10^3/\mu\text{L}$ ) | 518 | 0.47 | 11.27 |
| Mono ( $10^3/\mu\text{L}$ ) | 522 | 0.14 | 1.11  |
| PLT ( $10^3/\mu\text{L}$ )  | 525 | 157  | 595   |

| Parameters (Unit) | n   | Min  | Max  |
|-------------------|-----|------|------|
| AST (U/L)         | 901 | 13   | 81   |
| ALT (U/L)         | 902 | 8    | 122  |
| LDH (U/L)         | 780 | 141  | 581  |
| CPK (U/L)         | 838 | 58   | 1316 |
| CRP (mg/dL)       | 93  | 0.01 | 0.64 |

# Supplementary figure 4

Corresponding Author; Shigeki Yagyu

● CAR-T A   
 ● CAR-T B   
 ● CAR-T C   
 ● Ctrl D   
 ● Ctrl E   
 ● Ctrl F

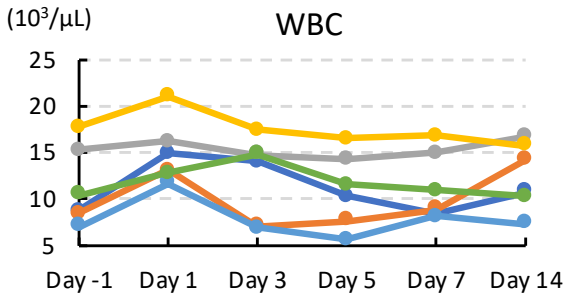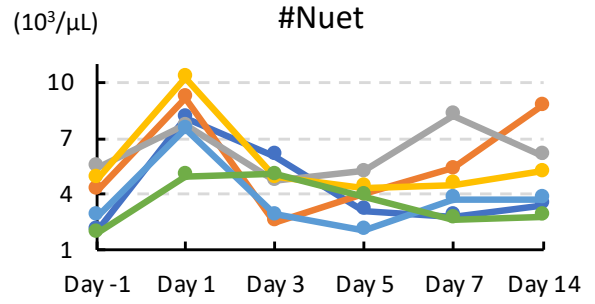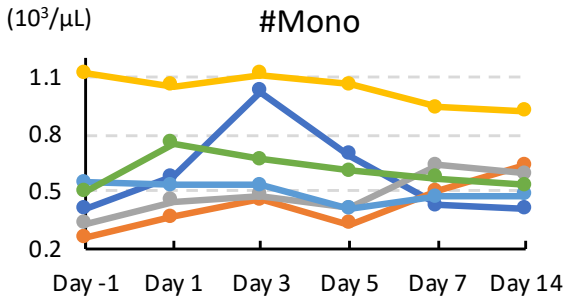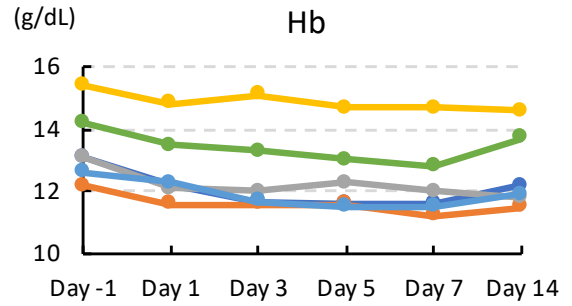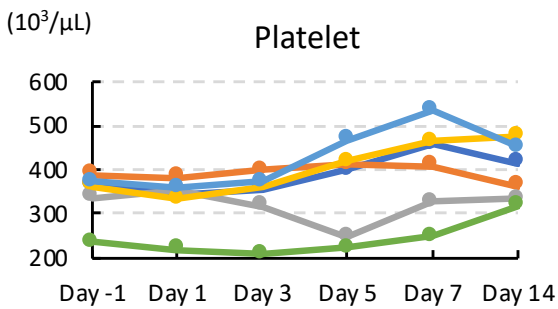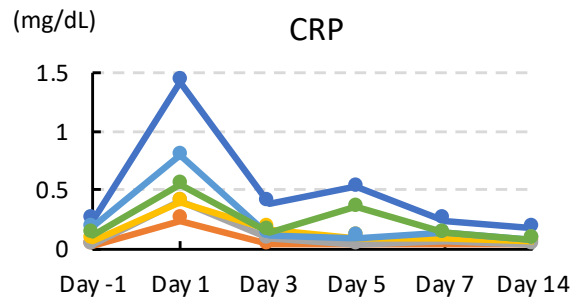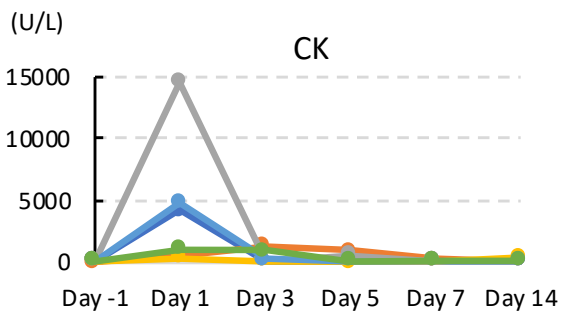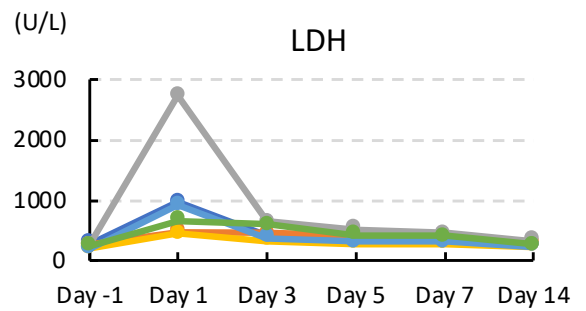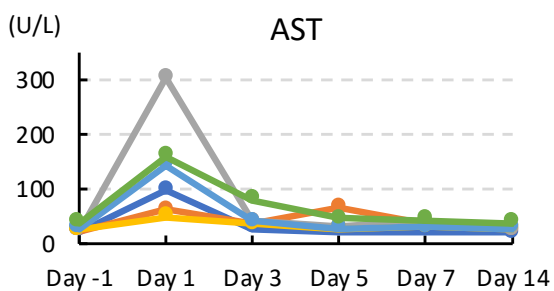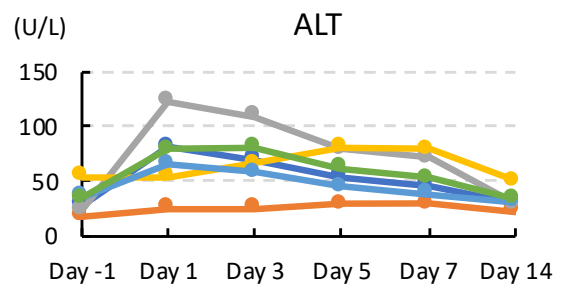

● CAR-T A   
 ● CAR-T B   
 ● CAR-T C   
 ● Ctrl D   
 ● Ctrl E   
 ● Ctrl F

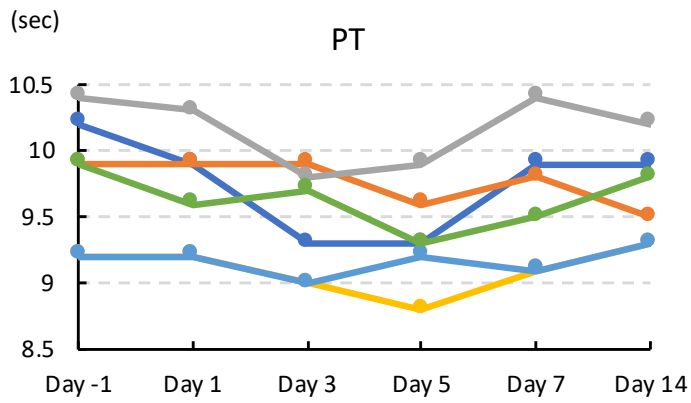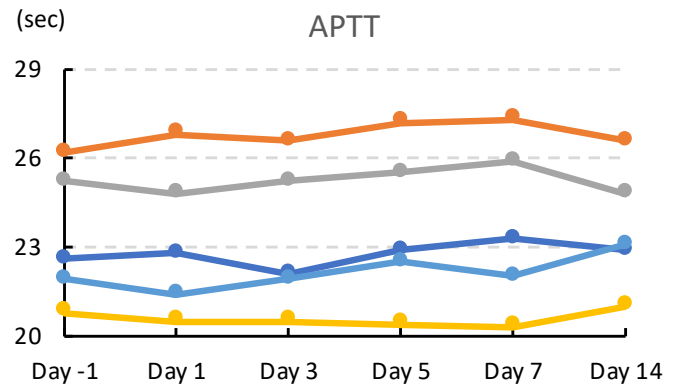

D-dimer (ng/mL)

|        | CAR-T A | CAR-T B | CAR-T C | Ctrl D  | Ctrl E  | Ctrl F  |
|--------|---------|---------|---------|---------|---------|---------|
| Day -1 | <200    | <200    | 200-500 | <200    | <200    | <200    |
| Day 1  | <200    | 200-500 | 200-500 | 200-500 | 500<    | 200-500 |
| Day 3  | 200-500 | <200    | 200-500 | 500<    | 200-500 | 200-500 |
| Day 5  | 500<    | 200-500 | 200-500 | 500<    | 200-500 | <200    |
| Day 7  | 200-500 | 200-500 | 200-500 | 500<    | 200-500 | 200-500 |
| Day 14 | <200    | 200-500 | 200-500 | 500<    | 500<    | <200    |

| Organ                     | Findings                            | Macaque |         |         |
|---------------------------|-------------------------------------|---------|---------|---------|
|                           |                                     | CAR-T A | CAR-T B | CAR-T C |
| Liver                     | <i>infiltrate, mononuclear cell</i> | minimal | minimal | -       |
| Gallbladder               | Pathological change                 | -       | -       | -       |
| Kidney                    | <i>infiltrate, mononuclear cell</i> | minimal | mild    | minimal |
| Spleen                    | Pathological change                 | -       | -       | -       |
| Heart                     | Pathological change                 | -       | -       | -       |
| Brain                     | Pathological change                 | -       | -       | -       |
| Spinal cord<br>(thoracic) | Pathological change                 | -       | -       | -       |
